# Supplementary material for: Risk of stroke and retinopathy during GLP-1 receptor agonist cardiovascular outcome trials: An eight RCTs meta-analysis
Source: PubMed Central journal article supplement (PMC9760859; doi:10.3389/fendo.2022.1007980), 2022-12-05

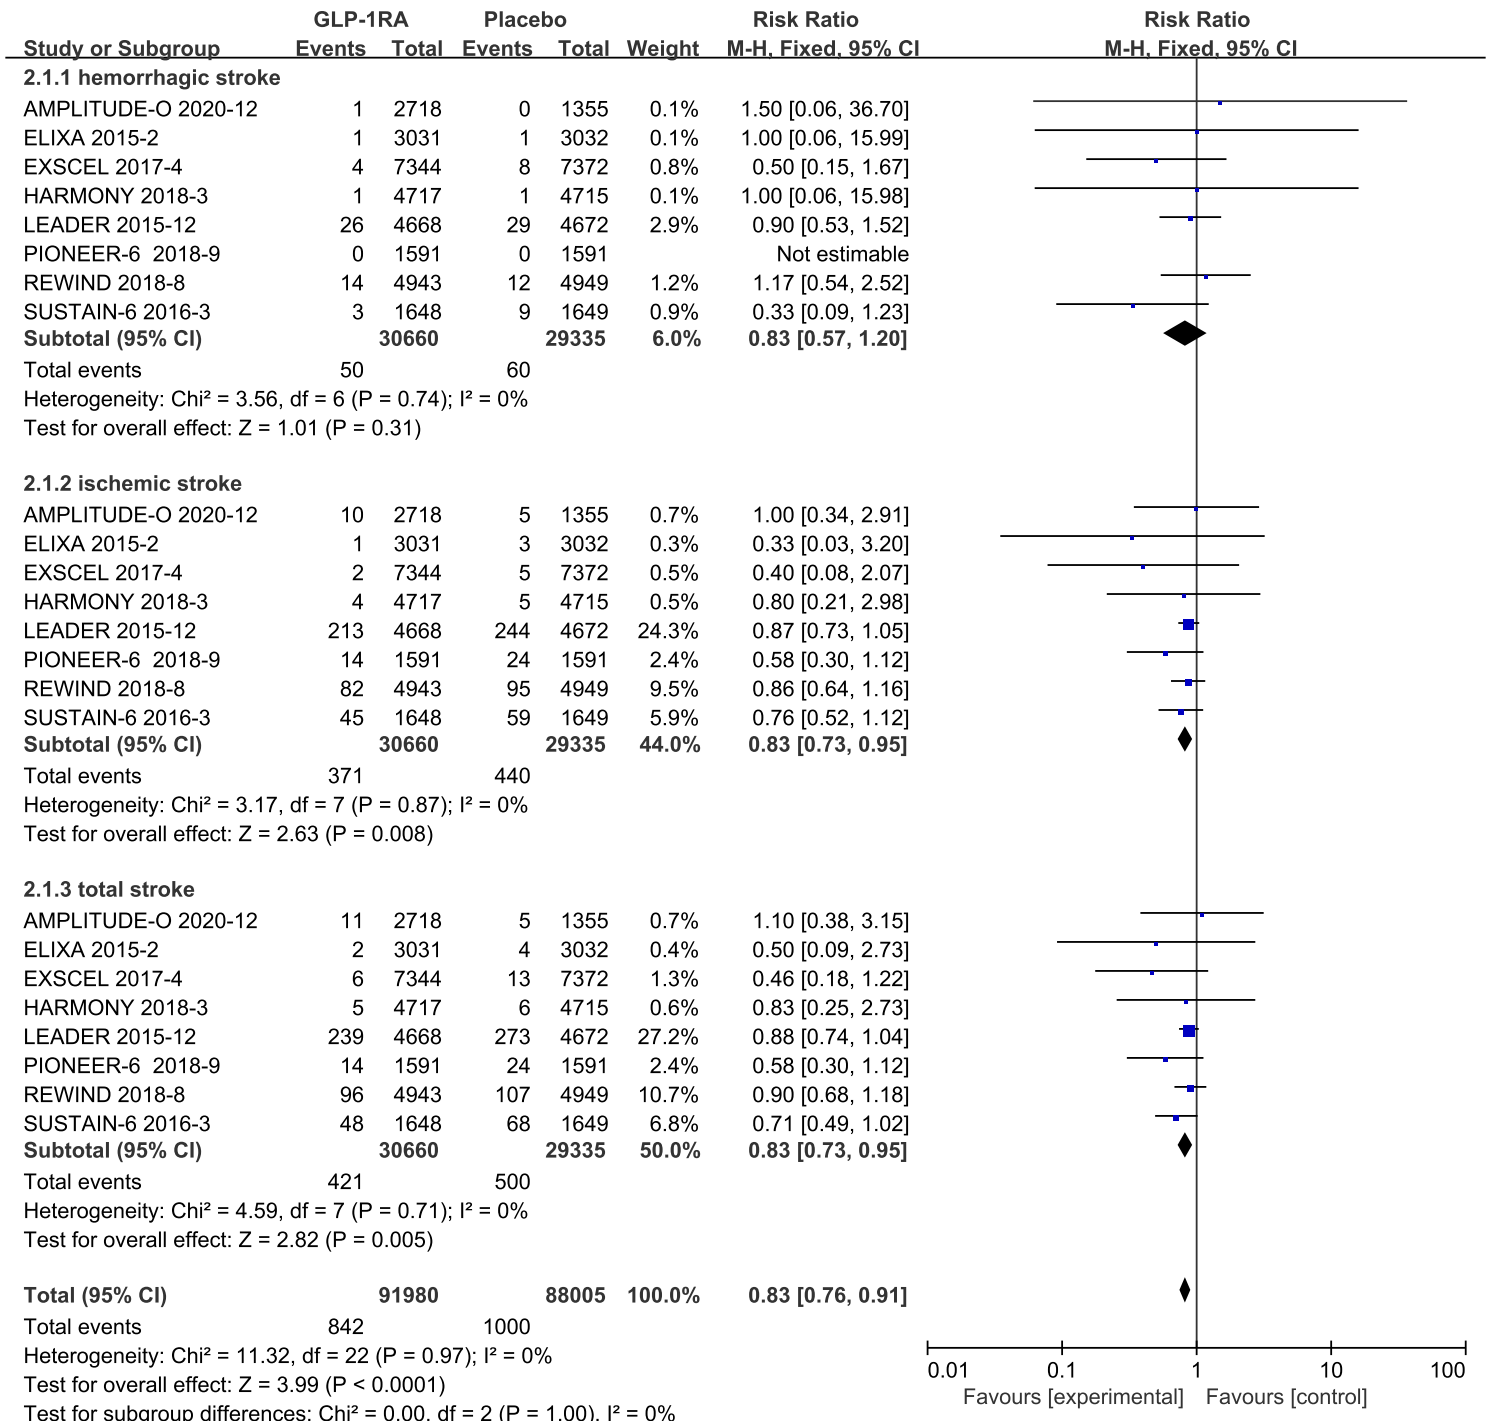

Supplement: DataSheet_1.pdf [file DataSheet_1.pdf]
