# Supplementary material for: Risk of stroke and retinopathy during GLP-1 receptor agonist cardiovascular outcome trials: An eight RCTs meta-analysis
Source: PubMed Central journal article supplement (PMC9760859; doi:10.3389/fendo.2022.1007980), 2022-12-05
Supplement: Presentation_1.pdf [file Presentation_1.pdf]

The primary and secondary cardiovascular outcomes pre-selected in 8 studies

1. ELIXA:

**Primary Outcome Measures :**

Time to First Occurrence of Primary CV Event: CV Death, Non-Fatal MI, Non-Fatal Stroke or Hospitalization for Unstable Angina [ Time Frame: From randomization up to the end of study (median follow-up of 25 months) ]

**Secondary Outcome Measures :**

Time to First Occurrence of CV Event: CV Death, Non-Fatal MI, Non-Fatal Stroke, Hospitalization for Unstable Angina or Hospitalization For Heart Failure [ Time Frame: From randomization up to the end of study (median follow-up of 25 months) ]

Time to First Occurrence of CV Event: CV Death, Non-Fatal MI, Non-Fatal Stroke, Hospitalization for Unstable Angina, Hospitalization For Heart Failure or Coronary Revascularization Procedure [ Time Frame: From randomization up to the end of study (median follow-up of 25 months) ]

Percent Change From Baseline in the Urinary Albumin/Creatinine Ratio (UACR) at Week 108 [ Time Frame: Baseline to Week 108 (LOCF) ]

2. LEADER

**Primary Outcome Measures :**

Time From Randomisation to First Occurrence of Cardiovascular Death, Non-fatal Myocardial Infarction, or Non-fatal Stroke (a Composite Cardiovascular Outcome) [ Time Frame: from randomisation (visit 3; month 0) to last contact (visit 16; up to month 60+30 days) ]

**Secondary Outcome Measures :**

Time From Rand. to First Occurrence of an Expanded Composite Cardiovascular Outcome Defined as Either Cardiovascular Death, Non-fatal Myocardial Infarction, Non-fatal Stroke, Revascularisation, Hospitalisation for Unstable Angina or for Heart Failure. [ Time Frame: from randomisation (visit 3; month 0) to last contact (visit 16; up to month 60+30 days) ]

Time From Randomisation to All Cause Death [ Time Frame: from randomisation (visit 3; month 0) to last contact (visit 16; up to month 60+30 days) ]

Time From Randomisation to Each Individual Component of the Expanded Composite Cardiovascular Outcome [ Time Frame: from randomisation (visit 3; month 0) to last contact (visit 16; up to month 60+30 days) ]

Time From Randomisation to First Occurrence of a Composite Microvascular Outcome [ Time Frame: from randomisation (visit 3; month 0) to last contact (visit 16; up to month 60+30 days) ]

Time From Randomisation to Each Individual Component of the Composite Microvascular Outcome and to the Retinopathy and Nephropathy Composite Outcomes Separately. [ Time Frame: from randomisation (visit 3; month 0) to last contact (visit 16; up to month 60+30 days) ]

### 3、 SUSTAIN™ 6

#### **Primary Outcome Measures :**

Time From Randomisation to First Occurrence of a MACE, Defined as Cardiovascular Death, Non-fatal Myocardial Infarction, or Non-fatal Stroke [ Time Frame: Time from randomisation up to end of follow-up (scheduled at week 109) ]

#### **Secondary Outcome Measures :**

Time From Randomisation to First Occurrence of an Expanded Composite Cardiovascular Outcome [ Time Frame: Time from randomisation up to end of follow-up (scheduled at week 109) ]

Time From Randomisation to Each Individual Component of the Expanded Composite Cardiovascular Outcome [ Time Frame: Time from randomisation up to end of follow-up (scheduled at week 109) ]

Time From Randomisation to First Occurrence of All-cause Death, Non-fatal MI, or Non-fatal Stroke [ Time Frame: Time from randomisation up to end of follow-up (scheduled at week 109) ]

Change From Baseline to Last Assessment in the Trial in Other Treatment Outcomes: Glycosylated Haemoglobin (HbA1c) [ Time Frame: Week 0, up to week 104 ]

Change From Baseline to Last Assessment in the Trial in Other Treatment Outcomes: Fasting Plasma Glucose [ Time Frame: Week 0, up to week 104 ]

Change From Baseline to Last Assessment in the Trial in Other Treatment Outcomes: Body Weight [ Time Frame: Week 0, up to week 104 ]

Change From Baseline to Last Assessment in the Trial in Other Treatment Outcomes: Lipid Profile [ Time Frame: Week 0, up to week 104 ]

Change From Baseline to Last Assessment in the Trial in Other Treatment Outcomes: Urinary Albumin to Creatinine Ratio [ Time Frame: Week 0, up to week 104 ]

Change From Baseline to Last Assessment in the Trial in Other Treatment Outcomes: Vital Signs [ Time Frame: Week 0, up to week 104 ]

Incidence During the Trial in Other Treatment Outcomes: Hypoglycaemic Events [ Time Frame: Week 0 - 109 ]

Incidence During the Trial in Other Treatment Outcomes: Adverse Events [ Time Frame: Weeks

0-109 ]

Occurrence During the Trial in Other Treatment Outcomes: Anti-semaglutide Antibodies [ Time Frame: Weeks 0-109 ]

Change From Baseline to Last Assessment in the Trial in Other Treatment Outcomes: Patient Reported Outcome (PRO) [ Time Frame: Week 0, up to week 104 ]

Change From Baseline to Last Assessment in the Trial in Other Treatment Outcomes: Lipid Profile (Free Fatty Acids) [ Time Frame: Week 0, up to week 104 ]

Change From Baseline to Last Assessment in the Trial in Other Treatment Outcomes: Vital Signs (Pulse Rate) [ Time Frame: Week 0, up to week 104 ]

#### 4、 EXSCEL

##### **Primary Outcome Measures :**

Primary Efficacy Outcome MACE Events [ Time Frame: Time to first event. Information collected during study period (anticipated to be up to 7.5 years). ]

Primary Safety Outcome MACE Events [ Time Frame: Time to first event. Information collected during study period (anticipated to be up to 7.5 years). ]

##### **Secondary Outcome Measures :**

Secondary Efficacy Outcome All-Cause Mortality [ Time Frame: Time to first event. Information collected during study period (anticipated to be up to 7.5 years). ]

Secondary Efficacy Outcome CV Death [ Time Frame: Time to first event. Information collected during study period (anticipated to be up to 7.5 years). ]

Secondary Efficacy Outcome MI [ Time Frame: Time to first event. Information collected during study period (anticipated to be up to 7.5 years). ]

Secondary Efficacy Outcome Stroke [ Time Frame: Time to first event. Information collected during study period (anticipated to be up to 7.5 years). ]

Secondary Efficacy Outcome Hospitalization for ACS [ Time Frame: Time to first event. Information collected during study period (anticipated to be up to 7.5 years). ]

Secondary Efficacy Outcome Hospitalization for HF [ Time Frame: Time to first event. Information collected during study period (anticipated to be up to 7.5 years). ]

#### 5、 Albiglutide

##### **Primary Outcome Measures :**

Time to First Occurrence of Major Adverse Cardiovascular Events (MACE) During Cardiovascular (CV) Follow-up Time Period [ Time Frame: Median of 1.65 person years for CV follow-up time period ]

**Secondary Outcome Measures :**

Time to First Occurrence of MACE or Urgent Revascularization for Unstable Angina [ Time Frame: Median of 1.65 person years for CV follow-up time period ]

Time to Adjudicated CV Death [ Time Frame: Median of 1.65 person years for the CV follow-up time period ]

Time to First Occurrence of Adjudicated MI [ Time Frame: Median of 1.65 person years for CV follow-up time period ]

Time to First Occurrence of Adjudicated Stroke [ Time Frame: Median of 1.65 person years for CV follow-up time period ]

Time to First Occurrence of Adjudicated CV Death or Hospitalization for Heart Failure (HF) [ Time Frame: Median of 1.65 person years for CV follow-up time period ]

Time to Initiation of Insulin of More Than 3 Months Duration for Those Participants Not Treated With Insulin at Study Start [ Time Frame: Up to 2.7 years ]

Time to Initiation of Prandial Insulin in Those Participants on Basal Insulin at Study Start [ Time Frame: Up to 2.7 years ]

Percentage of Participants Achieving Composite Metabolic Endpoint [ Time Frame: Months 8, 16, 24 and final assessment (up to 2.7 years) ]

Time to First Occurrence of a Clinically Important Microvascular Event [ Time Frame: Up to 2.7 years ]

Change From Baseline in HbA1c [ Time Frame: Baseline and Months 8 and 16 ]

Change From Baseline in Body Weight [ Time Frame: Baseline and Months 8 and 16 ]

Change From Baseline in Treatment Related Impact Measures-Diabetes (TRIM-D) Total Score [ Time Frame: Baseline and Months 8 and 16 ]

Change From Baseline in EuroQoL- 5 Dimension (EQ-5D) Visual Analogue Scale (VAS) Score [ Time Frame: Baseline and Months 8 and 16 ]

Time to Death [ Time Frame: Median of 1.73 years for the Vital Status follow-up time period ]

Number of Participants With Non-fatal Serious Adverse Events (SAEs) [ Time Frame: Up to 2.7 years ]

Number of Participants With Adverse Events (AEs) Leading to Discontinuation of Investigational Product (AELD) [ Time Frame: Up to 2.7 years ]

Number of Participants With AEs of Special Interest [ Time Frame: Up to 2.7 years ]

Change in Estimated Glomerular Filtration Rate (eGFR) Calculated Using Modification of Diet in Renal Disease (MDRD) Formula [ Time Frame: Baseline and Months 8 and 16 ]

Change From Baseline in Blood Pressure [ Time Frame: Baseline and Months 8,16,24 and end of study (up to 2.7 years) ]

Change From Baseline in Heart Rate [ Time Frame: Baseline and Months 8, 16, 24 and end of study (up to 2.7 years) ]

## 6、REWIND

### **Primary Outcome Measures :**

Number of Participants Who Experienced an Event For Time, From Randomization to First Occurrence of Cardiovascular Death, Non-fatal Myocardial Infarction, or Non-fatal Stroke (a Composite Cardiovascular Outcome) [ Time Frame: From randomization to first occurrence or death from any cause or study completion (Median Follow-Up of 5.4 Years) ]

### **Secondary Outcome Measures :**

Number of Participants Who Experienced an Event for Time to First Occurrence After Randomization of Cardiovascular Death, Non-fatal Myocardial Infarction, or Non-fatal Stroke, Individually [ Time Frame: From randomization to first occurrence or study completion (Median Follow-Up of 5.4 Years) ]

Number of Participants Who Experienced an Event for Time to All-cause Mortality [ Time Frame: From randomization to study completion (Median Follow-Up of 5.4 Years) ]

Number of Participants Who Experienced an Event for Time to First Occurrence After Randomization of the Composite Microvascular Endpoint [ Time Frame: From randomization to first occurrence or study completion (Median Follow-Up of 5.4 Years) ]

Number of Participants Who Experienced An Event for Time to First Occurrence After Randomization of Heart Failure Requiring Hospitalization or an Urgent Heart Failure Clinic Visit [ Time Frame: From randomization to first occurrence or study completion (Median Follow-Up of 5.4 Years) ]

Number of Participants Who Experienced an Event for Time to First Occurrence After

Randomization of First Hospitalization for Unstable Angina [ Time Frame: From randomization to first occurrence or study completion (Median Follow-Up of 5.4 Years) ]

## 7、 PIONEER 6

### **Primary Outcome Measures :**

Time From Randomisation to First Occurrence of a Major Adverse Cardiovascular Event (MACE) Composite Endpoint Consisting of: Cardiovascular Death, Non-fatal Myocardial Infarction or Non-fatal Stroke [ Time Frame: Maximum treatment duration is dependent on event rates and is estimated to be no longer than 19 months + 5 weeks of follow-up period. ]

### **Secondary Outcome Measures :**

1、 Time From Randomisation to First Occurrence of an Expanded Composite Cardiovascular Endpoint Consisting of: Cardiovascular Death, Non-fatal Myocardial Infarction, Non-fatal Stroke, UAP Requiring Hospitalisation or Hospitalisation for Heart Failure [ Time Frame: Maximum treatment duration is dependent on event rates and is estimated to be no longer than 19 months + 5 weeks of follow-up period. ]

2、 Time From Randomisation to First Occurrence of Each of the Individual Components in the Expanded Composite Cardiovascular Endpoint [ Time Frame: Maximum treatment duration is dependent on event rates and is estimated to be no longer than 19 months + 5 weeks of follow-up period. ]

3、 Time From Randomisation to First Occurrence of a Composite Endpoint Consisting of: All-cause Death, Non-fatal Myocardial Infarction or Nonfatal Stroke [ Time Frame: Maximum treatment duration is dependent on event rates and is estimated to be no longer than 19 months + 5 weeks of follow-up period. ]

4、 Time From Randomisation to First Occurrence of Fatal or Non-fatal Myocardial Infarction [ Time Frame: Maximum treatment duration is dependent on event rates and is estimated to be no longer than 19 months + 5 weeks of follow-up period. ]

5、 Time From Randomisation to First Occurrence of Fatal or Non-fatal Stroke [ Time Frame: Maximum treatment duration is dependent on event rates and is estimated to be no longer than 19 months + 5 weeks of follow-up period. ]

6、 Time From Randomisation to All-cause Death [ Time Frame: Maximum treatment duration is dependent on event rates and is expected to be no longer than 19 months + 5 weeks of follow-up period. ]

7、 Time to First AE Leading to Permanent Trial Product Discontinuation [ Time Frame: Maximum treatment duration is dependent on event rates and is expected to be no longer than 19 months + 38 days of ascertainment window. ]

- 8、 Change in Eye Examination Category [ Time Frame: Week -3, End of treatment ]
- 9、 Change in Pulse Rate [ Time Frame: Week 0, End of treatment ]
- 10、 Change in Systolic and Diastolic Blood Pressure [ Time Frame: Week 0, End of treatment ]
- 11、 Change in Glycosylated Haemoglobin (HbA1c) [ Time Frame: Week 0, End of treatment ]
- 12、 Change in Body Weight [ Time Frame: Week 0, End of treatment ]
- 13、 Change in Total Cholesterol - Ratio to Baseline [ Time Frame: Week 0, End of treatment ]
- 14、 Change in LDL-cholesterol - Ratio to Baseline [ Time Frame: Week 0, End of treatment ]
- 15、 Change in HDL-cholesterol - Ratio to Baseline [ Time Frame: Week 0, End of treatment ]
- 16、 Change in Triglycerides - Ratio to Baseline [ Time Frame: Week 0, End of treatment ]

## 8、 AMPLITUDE-O

### **Primary Outcome Measures :**

Time to First Occurrence of Major Adverse Cardiovascular Events (MACE): Event Rate Per 100 Participant-years for First Occurrence of Major Cardiovascular (CV) Event - Non-Inferiority Analysis [ Time Frame: From Day 1 until the date of first adjudicated and confirmed occurrence of major CV event (maximum duration: up to 31.5 months) ]

### **Secondary Outcome Measures :**

Time to First Occurrence of Major Adverse Cardiovascular Events: Event Rate Per 100 Participant-years for First Occurrence of Major Cardiovascular Event - Superiority Analysis [ Time Frame: From Day 1 until the date of first adjudicated and confirmed occurrence of major CV event (maximum duration: up to 31.5 months) ]

Time to First Occurrence of the Expanded Major Adverse Cardiovascular Events Composite Events: Event Rate Per 100 Participant-years for First Occurrence of Expanded Major Cardiovascular Event [ Time Frame: From Day 1 until the date of first adjudicated and confirmed occurrence of major CV event (maximum duration: up to 31.5 months) ]

Time to First Occurrence of Composite Renal Endpoint: Event Rate Per 100 Participant-years for First Occurrence of Composite Renal Endpoint [ Time Frame: From Day 1 until the confirmed occurrence of composite renal endpoint (maximum duration: up to 31.5 months) ]
